# Supplementary material
Source: publisher figshare collection journal article supplement (https://sage.figshare.com/ndownloader/files/22213647)
Supplement: Supplementary file 1 [file 22213647]

## Online Supplement 1

### 1. Example of search strategy

Database / information source: Ovid MEDLINE(R) In-Process & Other Non-Indexed Citations and Ovid MEDLINE(R) <1946 to Present>

Interface / URL: OVIDSP

Search date: 28/08/12

Retrieved records: 123

Search strategy:

- 1 dementia/ or alzheimer disease/ or aphasia, primary progressive/ (87566)
- 2 (dementia or demented or confused).ti,ab. (69187)
- 3 alzheimer\$1.ti,ab,jw. (80263)
- 4 or/1-3 (140560)
- 5 (life adj4 story\$).ti,ab. (471)
- 6 (life adj4 stories).ti,ab. (279)
- 7 (life adj4 review).ti,ab. (1831)
- 8 (life adj4 history).ti,ab. (9320)
- 9 (life adj4 histories).ti,ab. (1457)
- 10 (life adj4 narrative\$1).ti,ab. (280)
- 11 or/5-10 (12965)
- 12 4 and 11 (146)
- 13 animals/ not humans/ (3678892)
- 14 (rat or rats or mouse or mice or murine or rodent or rodents or hamster or hamsters or pig or pigs or porcine or rabbit or rabbits or dogs or dog or cat or cats or cow or cows or bovine or sheep or ovine or monkey or monkeys or horse or horses).ti. (1686732)
- 15 12 not (13 or 14) (145)
- 16 limit 15 to english language (123)

## 2. Concluding theories (to level 2 only)

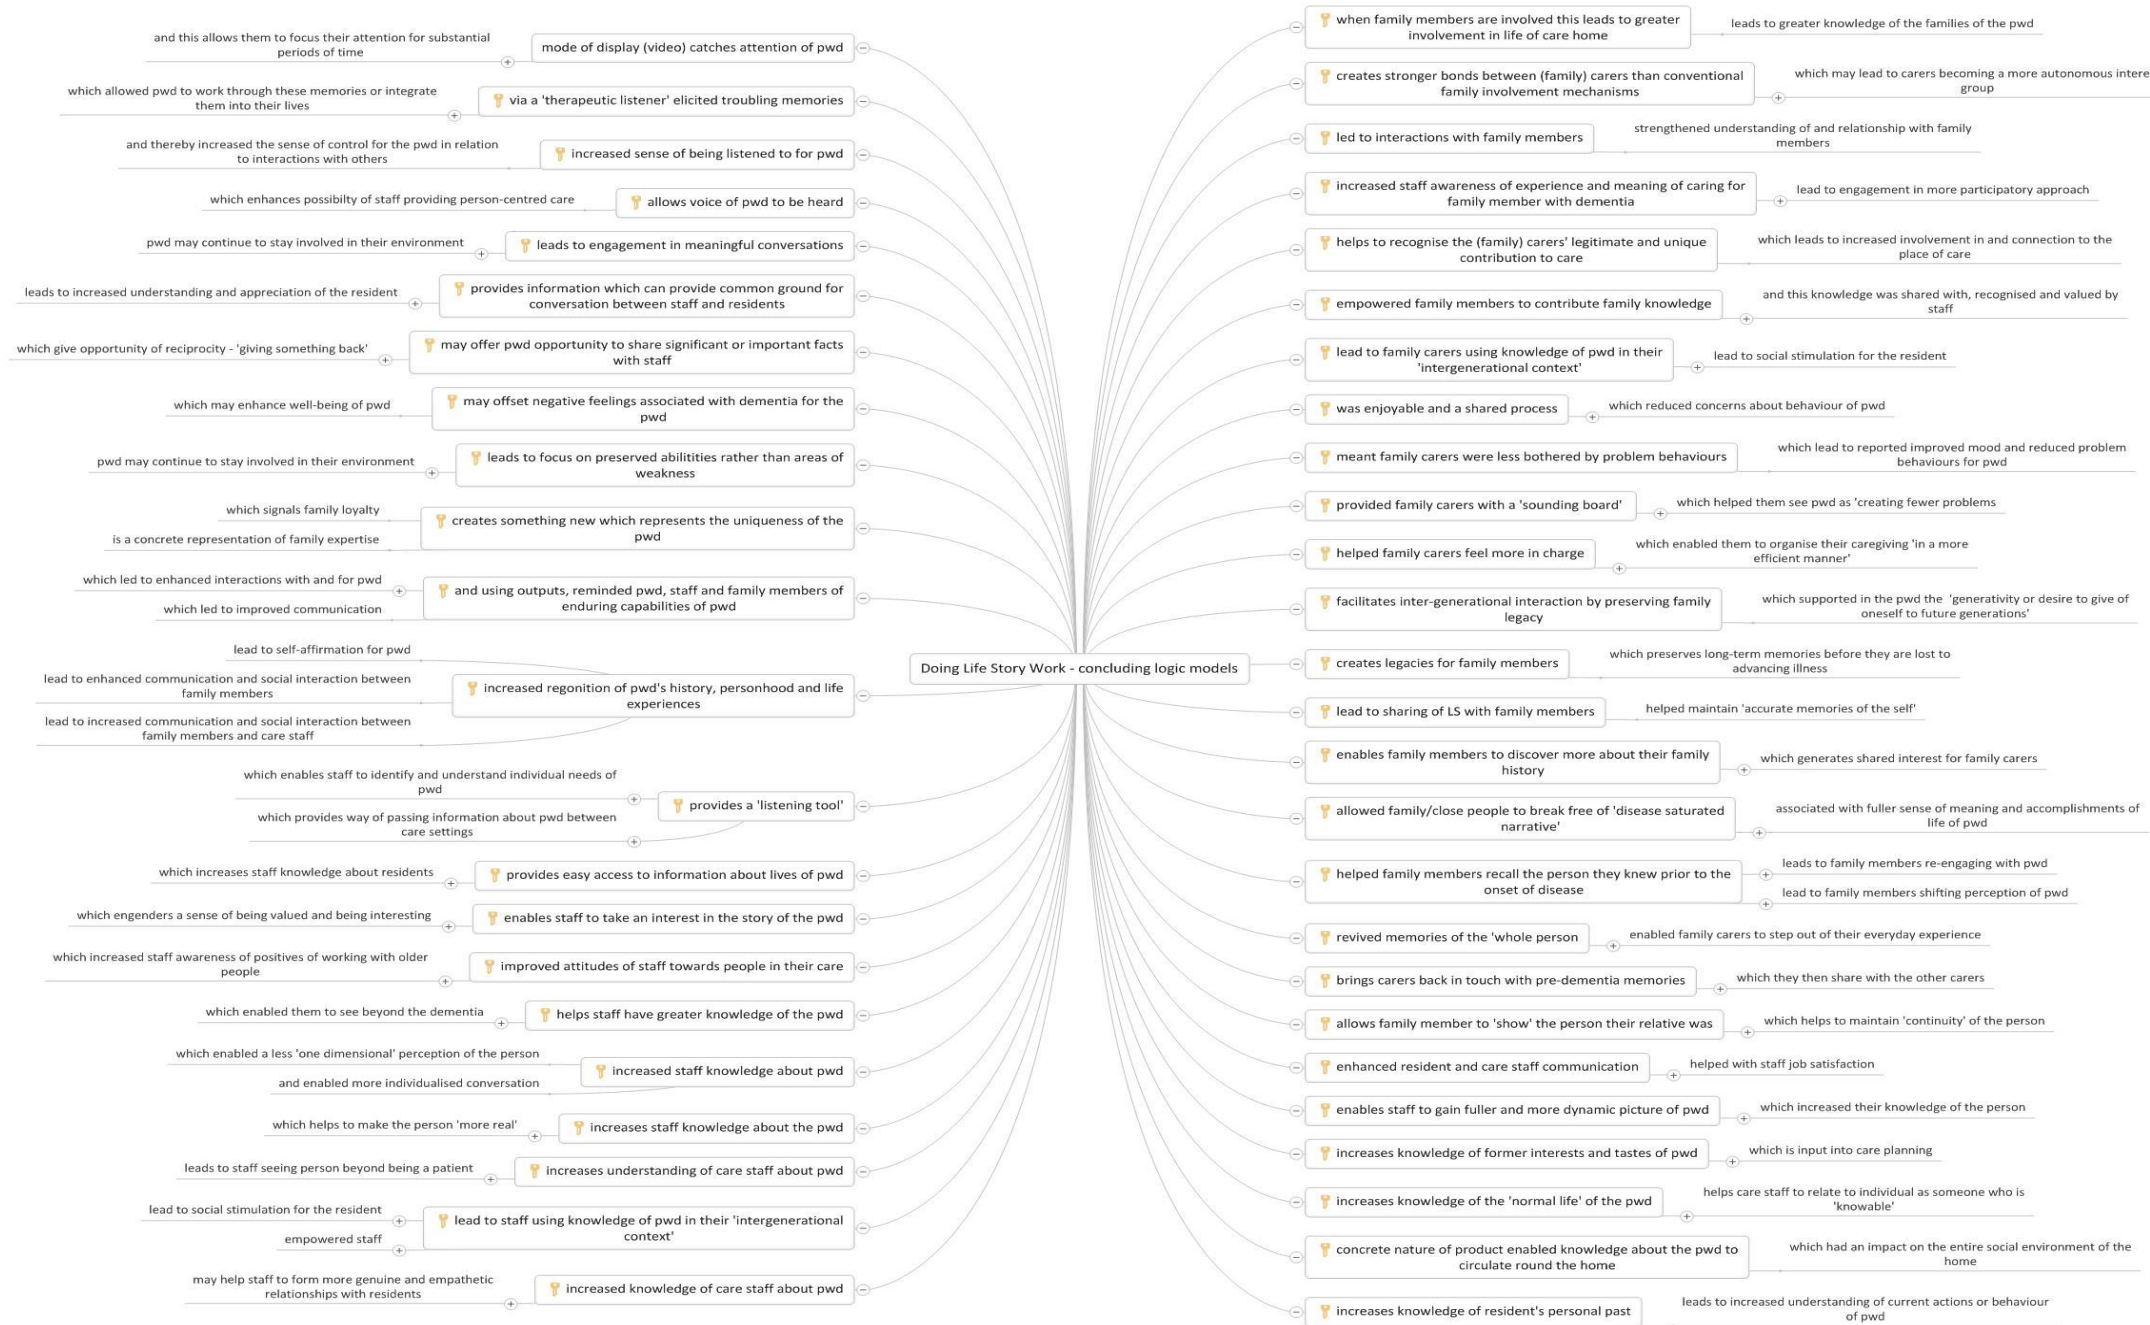

Working from the centre of the mind map, the first columns on both sides show the first argued intermediate process from each included paper, and the second columns the next intermediate processes or final outcomes. As described in the text, some programme theories had several intermediate processes.
